# Supplementary material for: Senescent thyrocytes and thyroid tumor cells induce M2-like macrophage polarization of human monocytes via a PGE2-dependent mechanism
Source: PubMed Central journal article supplement (PMC6528237; doi:10.1186/s13046-019-1198-8), 2019-05-21

**a**

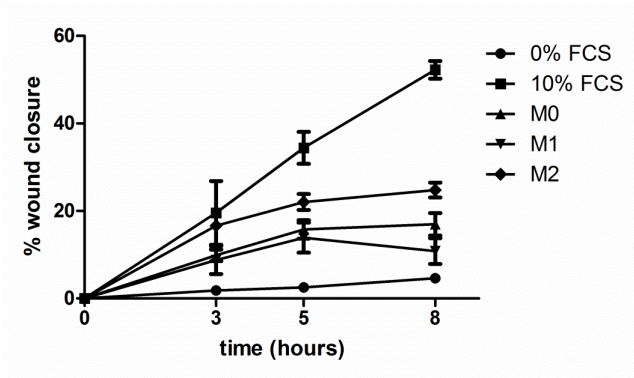

**b**

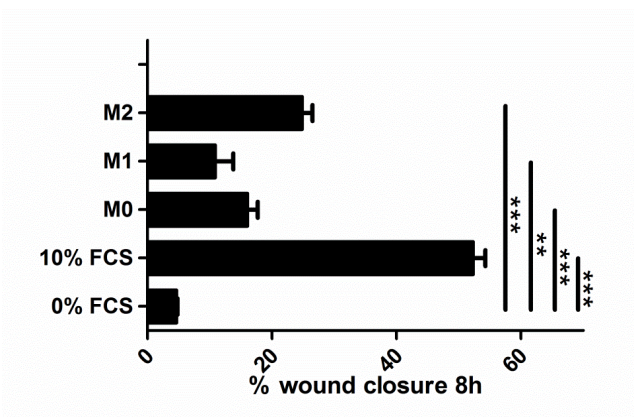

Supplement: 13046_2019_1198_MOESM4_ESM.pdf [file 13046_2019_1198_MOESM4_ESM.pdf]
